# Supplementary material for: Modularity increases rate of floral evolution and adaptive success for functionally specialized pollination systems
Source: PubMed Central journal article supplement (PMC6895197; doi:10.1038/s42003-019-0697-7), 2019-12-05
Supplement: 42003_2019_697_MOESM1_ESM.pdf [file 42003_2019_697_MOESM1_ESM.pdf]

## Supplementary Figures

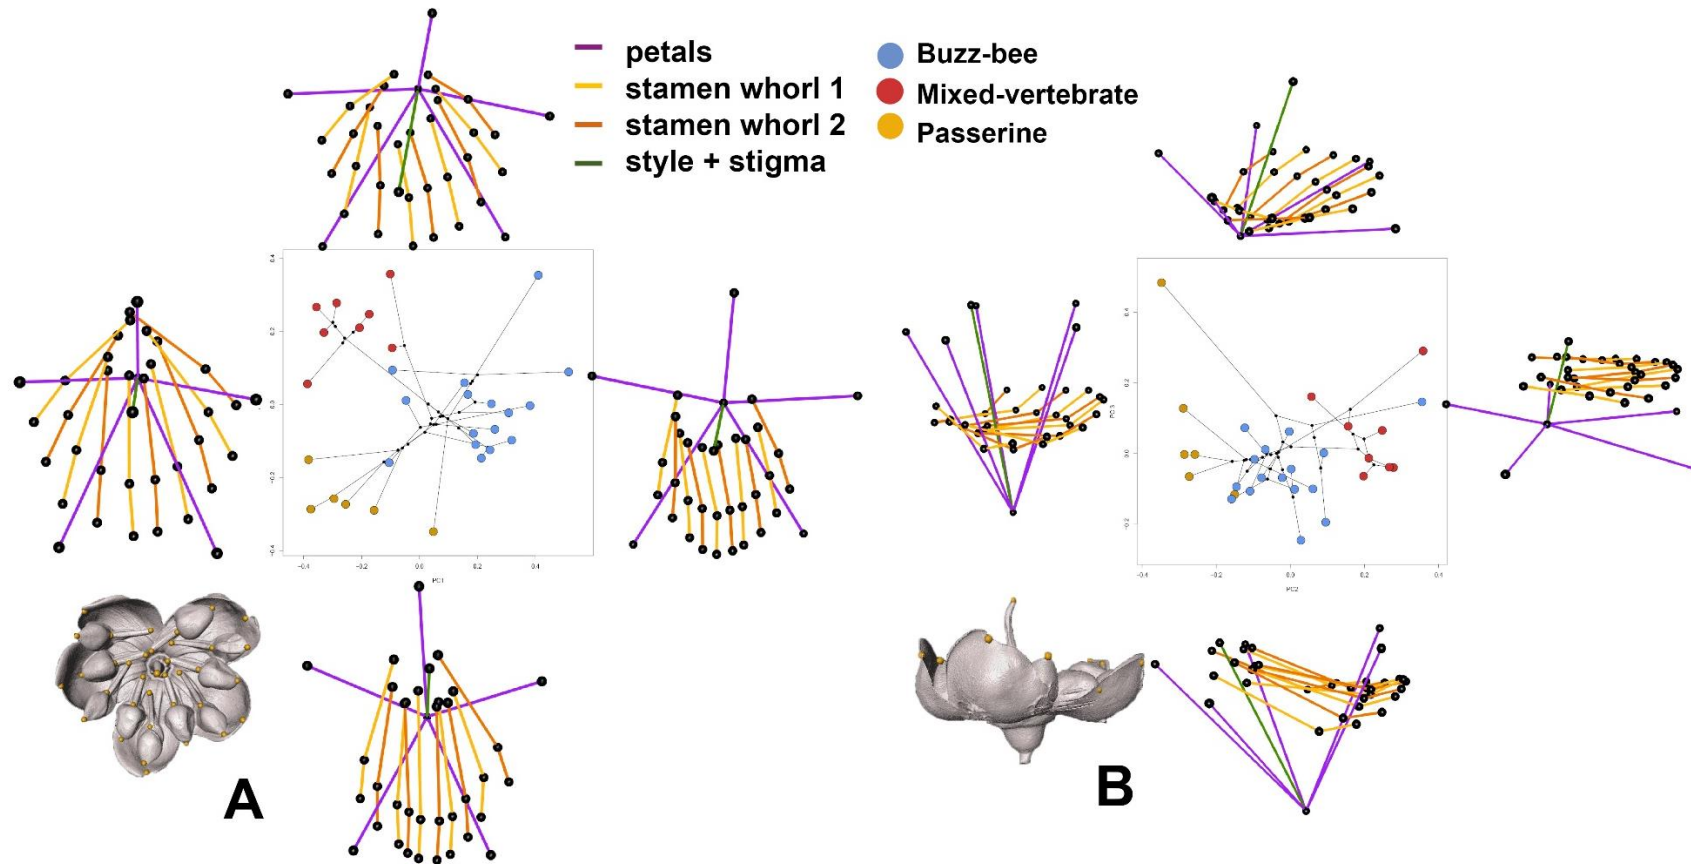

**Supplementary Figure 1. Flower shape change (organs represented by wireframes) in the phylo-morphospace (Fig. 3D in main text). A)** Shape change when flower is viewed from the front; note the change from a tightly aggregated, monosymmetric androecium at the positive extreme of PC1 and the negative extreme of PC2 (‘buzz-bee’ and ‘mixed-vertebrate’ flowers), while stamens are arranged more broadly at the negative extreme of PC1 and positive extreme of PC2. (‘passerine’ syndrome flowers). **B)** Shape change when flower is viewed from the side; marked change in corolla shape becomes apparent from reflexed/open corolla to pseudo-tubular corolla along PC1; also note change in androecial arrangement from bent in stamens (positive extreme of PC1) to

reflexed stamens with anther pores elevated towards the stigma (negative extreme of PC2). Colour coding of wireframes follows the developmental Hyp. 1 (Fig. 1 in main text).

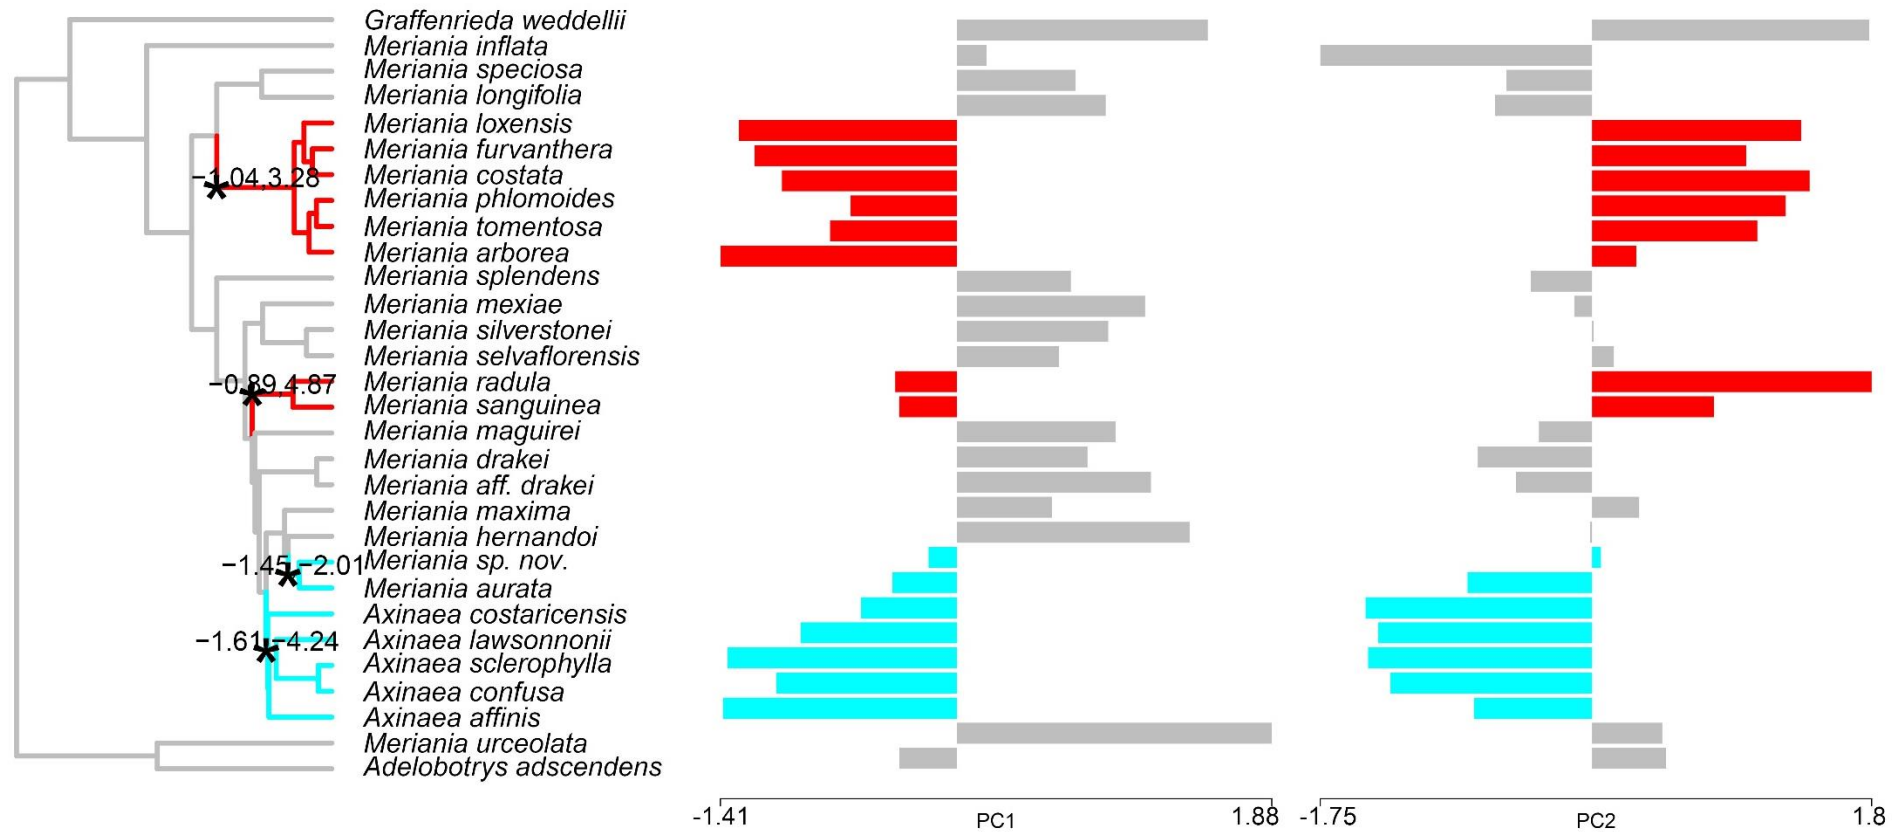

**Supplementary Figure 2. The four estimated shifts in phenotypic optima assessed on PC1 and PC2 of Merianieae floral shape space on the MCC-tree.** Significant shifts are indicated by asterisks and represent three of the four transitions from ‘buzz-bee’ to vertebrate pollination, and one transition within the ‘buzz-bee’ syndrome. The red colouration of two shifts indicates convergence in floral shape within the ‘mixed-vertebrate’ syndrome, the blue colouration indicates convergence in the shift to the ‘passerine’ syndrome and two ‘buzz-bee’ syndrome species with salverform corolla shapes. Regime shifts were evaluated on PC1 and PC2, PC1 summarizes corolla shape from reflexed (only ‘buzz-bee’) to pseudo-tubular corollas in the two vertebrate pollination syndromes and some ‘buzz-bee’ syndrome species. PC2 summarizes stamen arrangement, reflexed in the ‘mixed-vertebrate’ syndrome (and few ‘buzz-bee’ syndrome species) and bent-in in the ‘passerine’ and most ‘buzz-bee’ syndrome species.

## Supplementary Tables

**Supplementary Table 1. Specification of the five hypotheses of modularity, landmark partitioning, source of modularity hypothesis and expectations for the three different pollination syndromes in Merianieae.**

| Hypotheses                                                                                                                                                                                         | Landmark partitioning                                                                                           | Source     | Expectations for pollination syndromes                                                                                                                                                 |
|----------------------------------------------------------------------------------------------------------------------------------------------------------------------------------------------------|-----------------------------------------------------------------------------------------------------------------|------------|----------------------------------------------------------------------------------------------------------------------------------------------------------------------------------------|
| Hyp. 1: <i>Developmental units</i> : corolla (M1), outer stamen whorl (M2), inner stamen whorl (M3), style (M4)                                                                                    | M1: 33-37; M2: 1,3,5,7,9,11,13,15,17,19,21,23,25,27,29; M3: 2,4,6,8,10,12,14,16,18,20,22,24,26,28,30; M4: 31,32 | 1          | no expectation                                                                                                                                                                         |
| Hyp. 2: <i>Attraction</i> (M1) versus <i>reproductive organs</i> (M2)                                                                                                                              | M1: 31, 33-37<br>M2: 1-30, 32                                                                                   | 1; 2       | <i>modularity of corolla as an attraction trait in all systems</i>                                                                                                                     |
| Hyp. 3: <i>Attraction (corolla and stamen appendages, M1) versus efficiency (pore locations and stigma, M2)</i>                                                                                    | M1: 1-20, 31, 33-37<br>M2: 21-30, 32                                                                            | 3          | <i>modularity in 'buzz-bee' syndrome (corolla as landing platform and stamens as handles for buzzing) but not in 'mixed-vertebrate' and 'passerine'</i>                                |
| Hyp. 4: <i>Attraction (appendages, M1) versus efficiency (pore location, stigma and corolla, M2)</i>                                                                                               | M1: 1-20,<br>M2: 21-37                                                                                          | 3          | <i>modularity in 'passerine' and possibly 'mixed-vertebrate' syndrome (corolla mediates fit, appendages trigger bellows in 'passerine') but no fit-function in 'buzz-bee' syndrome</i> |
| Hyp. 5: <i>Merianieae specific functional modules: attraction (corolla, M1) versus pollen expulsion (stamen appendages, M2) versus efficiency (pore locations and stigma, pollen transfer, M3)</i> | M1: 31, 33-37<br>M2: 1-20<br>M3: 21-30, 32                                                                      | this study | <i>modularity in 'buzz-bee' and 'passerine' syndrome (appendages as triggers for pollen expulsion mechanisms) but not 'mixed-vertebrate' syndrome</i>                                  |

## Supplementary Results

**Supplementary Table 2. Pairwise comparison of effect sizes of the five hypotheses on floral modularity for the three different pollination syndromes.** The lower off-diagonal values represent the pairwise differences in z-scores (effect sizes) of the CR coefficient, the upper off-diagonal gives their associated p-values (i.e.  $p < 0.05$  indicating a significant difference in modularity; significant p-values printed in italics);  $n = 137$  specimens.

| Hyp. 1           | buzz-bee | mixed-vertebrate  | passerine         |
|------------------|----------|-------------------|-------------------|
| buzz-bee         |          | <i>0.013</i>      | <i>0.033</i>      |
| mixed-vertebrate | 2.223    |                   | 0.343             |
| passerine        | 1.842    | 0.403             |                   |
| Hyp. 2           | buzz-bee | mixed-vertebrate  | passerine         |
| buzz-bee         |          | <i>0.050</i>      | <i>0.048</i>      |
| mixed-vertebrate | 1.640    |                   | 0.492             |
| passerine        | 1.666    | 0.020             |                   |
| Hyp. 3           | buzz-bee | mixed-vertebrate  | passerine         |
| buzz-bee         |          | 0.111             | 0.080             |
| mixed-vertebrate | 1.223    |                   | 0.464             |
| passerine        | 1.403    | 0.090             |                   |
| Hyp. 4           | buzz-bee | mixed-vertebrate  | passerine         |
| buzz-bee         |          | <i>&lt; 0.001</i> | 0.130             |
| mixed-vertebrate | 3.299    |                   | <i>&lt; 0.001</i> |
| passerine        | 1.129    | 3.567             |                   |
| Hyp. 5           | buzz-bee | mixed-vertebrate  | passerine         |
| buzz-bee         |          | <i>0.009</i>      | 0.065             |
| mixed-vertebrate | 2.381    |                   | 0.058             |
| passerine        | 1.514    | 1.570             |                   |

**Supplementary Table 3. Results from the rarefaction analyses of the five different hypotheses on modularity (Fig. 2) for the three pollination syndromes.** The averages over 100 runs are given ( $n = 100$ ). Highest modularity was found in the ‘buzz-bee’ syndrome and lowest modularity in the ‘mixed-vertebrate’ syndrome. In contrast to analyses on the mean shape, evolutionary modularity accounting for phylogenetic relatedness (column “Merianieae”) was only found in Hyp. 2 in the resampled dataset. CR – Covariance Ratio.  $p$  – p-value  $< 0.05$  indicates significantly smaller CR than expected when no modularity is present.  $Z$  – effect sizes of CR.

| modularity hypothesis | buzz-bee |              |       | mixed-vertebrate |          |       | passerine |          |       | Merianieae |          |
|-----------------------|----------|--------------|-------|------------------|----------|-------|-----------|----------|-------|------------|----------|
|                       | CR       | <i>p</i>     | Z     | CR               | <i>p</i> | Z     | CR        | <i>p</i> | Z     | CR         | <i>p</i> |
| Hyp. 1                | 0.815    | <i>0.001</i> | 2.522 | 0.109            | 0.706    | 0.831 | 1.055     | 0.335    | 0.369 | 1.547      | 0.998    |

|               |       |       |       |       |       |       |       |       |        |       |       |
|---------------|-------|-------|-------|-------|-------|-------|-------|-------|--------|-------|-------|
| <b>Hyp. 2</b> | 0.885 | 0.037 | 1.910 | 1.005 | 0.328 | 0.547 | 1.012 | 0.195 | 0.640  | 0.994 | 0.256 |
| <b>Hyp. 3</b> | 0.943 | 0.056 | 1.915 | 0.979 | 0.199 | 1.087 | 0.996 | 0.114 | 1.406  | 0.949 | 0.087 |
| <b>Hyp. 4</b> | 0.812 | 0.001 | 5.722 | 0.925 | 0.058 | 2.609 | 0.814 | 0.001 | 11.149 | 1.018 | 0.355 |
| <b>Hyp. 5</b> | 0.839 | 0.002 | 3.303 | 0.954 | 0.074 | 1.852 | 0.903 | 0.005 | 4.175  | 0.97  | 0.118 |

**Supplementary Table 4. Results from the down sampling analyses (50%) of the five different hypotheses on modularity for the three pollination syndromes.** The averages over 100 runs are given (n = 100). Congruent with the analyses on the full dataset, highest modularity was found in the ‘buzz-bee’ syndrome and lowest modularity in the ‘mixed-vertebrate’ syndrome. In contrast to the full dataset, there was no significant modularity in the ‘mixed-vertebrate’ syndrome. CR – Covariance Ratio. p – p-value <0.05 indicates significantly smaller CR than expected when no modularity is present. Z – effect sizes of CR.

| modularity hypothesis | buzz-bee |       |       | mixed-vertebrate |       |       | passerine |       |       |
|-----------------------|----------|-------|-------|------------------|-------|-------|-----------|-------|-------|
|                       | CR       | p     | Z     | CR               | p     | Z     | CR        | p     | Z     |
| <b>Hyp. 1</b>         | 0.934    | 0.050 | 1.910 | 1.138            | 0.617 | 1.036 | 1.056     | 0.301 | 0.697 |
| <b>Hyp. 2</b>         | 0.937    | 0.061 | 1.776 | 1.015            | 0.307 | 0.916 | 1.027     | 0.273 | 0.697 |
| <b>Hyp. 3</b>         | 0.968    | 0.082 | 1.807 | 1.001            | 0.261 | 1.219 | 0.985     | 0.137 | 2.285 |
| <b>Hyp. 4</b>         | 0.898    | 0.010 | 4.459 | 0.990            | 0.179 | 1.758 | 0.908     | 0.029 | 7.984 |
| <b>Hyp. 5</b>         | 0.911    | 0.009 | 2.963 | 1.002            | 0.147 | 1.501 | 0.963     | 0.045 | 3.015 |

**Supplementary Table 5. The number of times a modularity hypothesis was found to be significant in the rarefied and the down sampled (to 50%) datasets over 100 runs each; n = 100.**

| rarefaction             | Hyp. 1 | Hyp. 2 | Hyp. 3 | Hyp. 4 | Hyp. 5 |
|-------------------------|--------|--------|--------|--------|--------|
| <b>buzz-bee</b>         | 100    | 75     | 92     | 100    | 100    |
| <b>mixed-vertebrate</b> | 0      | 1      | 7      | 59     | 50     |
| <b>passerine</b>        | 0      | 0      | 28     | 100    | 100    |
| <b>Merianieae</b>       | 0      | 5      | 92     | 46     | 64     |

  

| down sampling           | Hyp. 1 | Hyp. 2 | Hyp. 3 | Hyp. 4 | Hyp. 5 |
|-------------------------|--------|--------|--------|--------|--------|
| <b>buzz-bee</b>         | 100    | 74     | 55     | 100    | 100    |
| <b>mixed-vertebrate</b> | 0      | 0      | 17     | 66     | 53     |
| <b>passerine</b>        | 0      | 0      | 33     | 100    | 100    |

**Supplementary Table 6. The number of times strength of modularity (calculated through z-scores) was significantly different between pollination syndromes.** The upper off-diagonal gives results for the rarefied dataset, the lower off-diagonal gives results for the down sampled (to 50%) datasets over 100 runs each. Results were consistent between the two analyses, apart from Hyp. 3, where we detected higher modularity in the rarefied dataset than in the down sample dataset; n = 100.

| Hyp. 1                  | buzz-bee | mixed-vertebrate | passerine |
|-------------------------|----------|------------------|-----------|
| <b>buzz-bee</b>         |          | 98               | 72        |
| <b>mixed-vertebrate</b> | 96       |                  | 6         |
| <b>passerine</b>        | 90       | 5                |           |

| Hyp. 2                  | <b>buzz-bee</b> | <b>mixed-vertebrate</b> | <b>passerine</b> |
|-------------------------|-----------------|-------------------------|------------------|
| <b>buzz-bee</b>         |                 | 25                      | 16               |
| <b>mixed-vertebrate</b> | 29              |                         | 0                |
| <b>passerine</b>        | 24              | 0                       |                  |
| Hyp. 3                  | <b>buzz-bee</b> | <b>mixed-vertebrate</b> | <b>passerine</b> |
| <b>buzz-bee</b>         |                 | 43                      | 48               |
| <b>mixed-vertebrate</b> | 8               |                         | 0                |
| <b>passerine</b>        | 20              | 1                       |                  |
| Hyp. 4                  | <b>buzz-bee</b> | <b>mixed-vertebrate</b> | <b>passerine</b> |
| <b>buzz-bee</b>         |                 | 90                      | 27               |
| <b>mixed-vertebrate</b> | 77              |                         | 90               |
| <b>passerine</b>        | 23              | 83                      |                  |
| Hyp. 5                  | <b>buzz-bee</b> | <b>mixed-vertebrate</b> | <b>passerine</b> |
| <b>buzz-bee</b>         |                 | 94                      | 29               |
| <b>mixed-vertebrate</b> | 74              |                         | 41               |
| <b>passerine</b>        | 23              | 36                      |                  |

**Supplementary Table 7. Model parameters and log-likelihood fits for the five hypotheses of modularity (Hyp1-5) and a hypothesis of no modularity for all Merianieae species of this study (n=30) and the different pollination syndromes separately. The optimal model for each dataset is highlighted in bold. Each modularity hypothesis is also analysed for within- and intermodule correlations: ‘same.Mod’- similar correlations within the modules, ‘same.between’ – similar correlations between modules; ‘sep.Mod’ – different correlations within the modules, ‘sep.between’ – different correlations between modules (see 12 for explanation.**

| Merianieae                          | LogL  | K  | n   | AICc    | dAICc | Model LogL | Model Posterior Probability |
|-------------------------------------|-------|----|-----|---------|-------|------------|-----------------------------|
| <b>Null modularity</b>              | 693.3 | 3  | 666 | -1380.7 | 83.5  | 0.000      | 0.000                       |
| <b>Hyp1.same.Mod + same.between</b> | 705.5 | 6  | 666 | -1398.9 | 65.2  | 0.000      | 0.000                       |
| <b>Hyp1.sep.Mod + same.between</b>  | 700.5 | 8  | 666 | -1384.7 | 79.4  | 0.000      | 0.000                       |
| <b>Hyp1.same.Mod + sep.between</b>  | 712.6 | 11 | 666 | -1402.8 | 61.3  | 0.000      | 0.000                       |
| <b>Hyp1.sep.Mod + sep.between</b>   | 689.7 | 2  | 666 | -1375.4 | 88.7  | 0.000      | 0.000                       |
| <b>Hyp2.same.Mod + same.between</b> | 691.7 | 3  | 666 | -1377.4 | 86.7  | 0.000      | 0.000                       |
| <b>Hyp2.sep.Mod + same.between</b>  | 699.6 | 4  | 666 | -1391.1 | 73.0  | 0.000      | 0.000                       |
| <b>Hyp3.same.Mod + same.between</b> | 725.5 | 3  | 666 | -1444.9 | 19.2  | 0.000      | 0.000                       |
| <b>Hyp3.sep.Mod + same.between</b>  | 728.5 | 4  | 666 | -1448.9 | 15.3  | 0.000      | 0.000                       |
| <b>Hyp4.same.Mod + same.between</b> | 715.5 | 3  | 666 | -1425.0 | 39.1  | 0.000      | 0.000                       |
| <b>Hyp4.sep.Mod + same.between</b>  | 716.1 | 4  | 666 | -1424.1 | 40.0  | 0.000      | 0.000                       |
| <b>Hyp5.same.Mod + same.between</b> | 729.2 | 3  | 666 | -1452.3 | 11.8  | 0.003      | 0.002                       |
| <b>Hyp5.sep.Mod + same.between</b>  | 733.8 | 5  | 666 | -1457.6 | 6.6   | 0.038      | 0.034                       |

|                             |              |          |            |                |            |              |              |
|-----------------------------|--------------|----------|------------|----------------|------------|--------------|--------------|
| Hyp5.same.Mod + sep.between | 734.5        | 5        | 666        | -1458.9        | 5.2        | 0.074        | 0.066        |
| Hyp5.sep.Mod + sep.between  | <b>739.1</b> | <b>7</b> | <b>666</b> | <b>-1464.1</b> | <b>0.0</b> | <b>1.000</b> | <b>0.897</b> |

#### buzz-bee' syndrome

|                              |              |          |            |                |            |              |              |
|------------------------------|--------------|----------|------------|----------------|------------|--------------|--------------|
| Null modularity              | 645.1        | 2        | 666        | -1286.1        | 26.5       | 0.000        | 0.000        |
| Hyp1.same.Mod + same.between | 648.9        | 3        | 666        | -1291.8        | 20.9       | 0.000        | 0.000        |
| Hyp1.sep.Mod + same.between  | 651.9        | 6        | 666        | -1291.7        | 21.0       | 0.000        | 0.000        |
| Hyp1.same.Mod + sep.between  | 654.8        | 8        | 666        | -1293.4        | 19.3       | 0.000        | 0.000        |
| Hyp1.sep.Mod + sep.between   | 657.8        | 11       | 666        | -1293.2        | 19.5       | 0.000        | 0.000        |
| Hyp2.same.Mod + same.between | 647.0        | 3        | 666        | -1288.0        | 24.6       | 0.000        | 0.000        |
| Hyp2.sep.Mod + same.between  | 648.7        | 4        | 666        | -1289.2        | 23.4       | 0.000        | 0.000        |
| Hyp3.same.Mod + same.between | 647.5        | 3        | 666        | -1288.9        | 23.7       | 0.000        | 0.000        |
| Hyp3.sep.Mod + same.between  | 651.0        | 4        | 666        | -1293.9        | 18.8       | 0.000        | 0.000        |
| Hyp4.same.Mod + same.between | <b>659.3</b> | <b>3</b> | <b>666</b> | <b>-1312.7</b> | <b>0.0</b> | <b>1.000</b> | <b>0.441</b> |
| Hyp4.sep.Mod + same.between  | 660.0        | 4        | 666        | -1311.9        | 0.7        | 0.694        | 0.306        |
| Hyp5.same.Mod + same.between | 656.5        | 3        | 666        | -1306.9        | 5.7        | 0.057        | 0.025        |
| Hyp5.sep.Mod + same.between  | 658.4        | 5        | 666        | -1306.7        | 6.0        | 0.051        | 0.022        |
| Hyp5.same.Mod + sep.between  | 660.0        | 5        | 666        | -1309.9        | 2.8        | 0.248        | 0.109        |
| Hyp5.sep.Mod + sep.between   | 661.9        | 7        | 666        | -1309.6        | 3.0        | 0.218        | 0.096        |

#### mixed-vertebrate' syndrome

|                              |              |          |            |               |            |              |              |
|------------------------------|--------------|----------|------------|---------------|------------|--------------|--------------|
| Null modularity              | 399.0        | 2        | 666        | -793.9        | 7.8        | 0.020        | 0.007        |
| Hyp1.same.Mod + same.between | 399.0        | 3        | 666        | -791.9        | 9.8        | 0.008        | 0.003        |
| Hyp1.sep.Mod + same.between  | 399.6        | 6        | 666        | -787.1        | 14.6       | 0.001        | 0.000        |
| Hyp1.same.Mod + sep.between  | 402.1        | 8        | 666        | -788.0        | 13.7       | 0.001        | 0.000        |
| Hyp1.sep.Mod + sep.between   | 402.7        | 11       | 666        | -783.1        | 18.6       | 0.000        | 0.000        |
| Hyp2.same.Mod + same.between | 400.5        | 3        | 666        | -795.0        | 6.8        | 0.034        | 0.012        |
| Hyp2.sep.Mod + same.between  | 400.5        | 4        | 666        | -793.0        | 8.7        | 0.013        | 0.004        |
| Hyp3.same.Mod + same.between | 399.7        | 3        | 666        | -793.4        | 8.3        | 0.016        | 0.006        |
| Hyp3.sep.Mod + same.between  | 401.3        | 4        | 666        | -794.5        | 7.2        | 0.028        | 0.010        |
| Hyp4.same.Mod + same.between | <b>403.9</b> | <b>3</b> | <b>666</b> | <b>-801.7</b> | <b>0.0</b> | <b>1.000</b> | <b>0.353</b> |
| Hyp4.sep.Mod + same.between  | 403.9        | 4        | 666        | -799.7        | 2.0        | 0.363        | 0.128        |
| Hyp5.same.Mod + same.between | 403.7        | 3        | 666        | -801.3        | 0.4        | 0.808        | 0.285        |
| Hyp5.sep.Mod + same.between  | 404.2        | 5        | 666        | -798.3        | 3.4        | 0.186        | 0.066        |
| Hyp5.same.Mod + sep.between  | 404.7        | 5        | 666        | -799.2        | 2.5        | 0.291        | 0.103        |
| Hyp5.sep.Mod + sep.between   | 405.2        | 7        | 666        | -796.3        | 5.4        | 0.066        | 0.023        |

#### passerine-syndrome

|                              |       |    |     |        |      |       |       |
|------------------------------|-------|----|-----|--------|------|-------|-------|
| Null modularity              | 294.0 | 2  | 666 | -584.0 | 7.4  | 0.025 | 0.011 |
| Hyp1.same.Mod + same.between | 294.2 | 3  | 666 | -582.3 | 9.1  | 0.011 | 0.005 |
| Hyp1.sep.Mod + same.between  | 296.4 | 6  | 666 | -580.6 | 10.8 | 0.005 | 0.002 |
| Hyp1.same.Mod + sep.between  | 294.5 | 8  | 666 | -572.9 | 18.5 | 0.000 | 0.000 |
| Hyp1.sep.Mod + sep.between   | 296.7 | 11 | 666 | -571.1 | 20.3 | 0.000 | 0.000 |
| Hyp2.same.Mod + same.between | 294.4 | 3  | 666 | -582.7 | 8.7  | 0.013 | 0.006 |
| Hyp2.sep.Mod + same.between  | 296.8 | 4  | 666 | -585.5 | 5.9  | 0.052 | 0.023 |
| Hyp3.same.Mod + same.between | 294.5 | 3  | 666 | -583.0 | 8.4  | 0.015 | 0.007 |
| Hyp3.sep.Mod + same.between  | 294.9 | 4  | 666 | -581.7 | 9.7  | 0.008 | 0.003 |

|                              |       |   |     |        |     |       |       |
|------------------------------|-------|---|-----|--------|-----|-------|-------|
| Hyp4.same.Mod + same.between | 298.7 | 3 | 666 | -591.4 | 0.0 | 1.000 | 0.437 |
| Hyp4.sep.Mod + same.between  | 299.2 | 4 | 666 | -590.3 | 1.1 | 0.565 | 0.247 |
| Hyp5.same.Mod + same.between | 297.1 | 3 | 666 | -588.1 | 3.3 | 0.190 | 0.083 |
| Hyp5.sep.Mod + same.between  | 298.8 | 5 | 666 | -587.5 | 3.9 | 0.145 | 0.063 |
| Hyp5.same.Mod + sep.between  | 298.8 | 5 | 666 | -587.6 | 3.8 | 0.148 | 0.065 |
| Hyp5.sep.Mod + sep.between   | 300.6 | 7 | 666 | -587.0 | 4.4 | 0.111 | 0.049 |

K – Model parameters. LogL – raw log-likelihood fits for each model. AICc – finite sample corrected Akaike Information Criterion. dAICc – difference between lowest AICc and each respective AICc. Model LogL – Model log-likelihood.

**Supplementary Table 8. Summary table of log-likelihood ratio tests on model fit on the rarefied and down sampled (to 50%) datasets.** The number of times any of the five hypotheses of modularity or a null-hypothesis of no modularity was found as best fit is given (100 runs; n = 100).

| rarefaction      | Hyp. 1 | Hyp. 2 | Hyp. 3 | Hyp. 4 | Hyp. 5 | no modularity |
|------------------|--------|--------|--------|--------|--------|---------------|
| buzz-bee         | 1      | 0      | 0      | 88     | 6      | 0             |
| mixed-vertebrate | 0      | 0      | 0      | 54     | 46     | 0             |
| passerine        | 0      | 0      | 0      | 100    | 0      | 0             |
| Merianieae       | 0      | 0      | 0      | 0      | 100    | 0             |

| down sampling    | Hyp. 1 | Hyp. 2 | Hyp. 3 | Hyp. 4 | Hyp. 5 | no modularity |
|------------------|--------|--------|--------|--------|--------|---------------|
| buzz-bee         | 11     | 1      | 3      | 63     | 22     | 0             |
| mixed-vertebrate | 0      | 1      | 5      | 40     | 10     | 44            |
| passerine        | 0      | 1      | 0      | 53     | 10     | 36            |

**Supplementary Table 9. Summary table of rarefaction analysis on differences in evolutionary rate of the different functional modules defined by Hyp. 4 and Hyp. 5.** Averages over 100 runs are given, \* indicate that significant differences were detected in all pairwise comparisons; these significant differences were detected in all 100 rarefaction runs and corolla shape always evolved significantly faster than the rest of the flower; n = 100.

|                      |                                         |
|----------------------|-----------------------------------------|
| <b>Hyp. 4</b>        | <b><math>R = 3.46, p = 0.001</math></b> |
| attraction           | 0.00018*                                |
| efficiency           | 0.00060*                                |
| <b>Hyp. 5</b>        | <b><math>R = 5.34, p = 0.001</math></b> |
| attraction (corolla) | 0.00093*                                |
| pollen expulsion     | 0.00018*                                |
| efficiency           | 0.00043*                                |

**Supplementary Table 10. Comparison of fit of four different models of trait evolution on landmark data** as assessed by GIC; estimated parameter values are given. The average GIC over 100 rarefaction runs is given. Note that the analysis of the original dataset resolved the OU-model as best fit while in the rarefaction analyses, the lambda model was found to fit the data best in 100% of cases.

| model           | GIC     | parameter | average GIC |
|-----------------|---------|-----------|-------------|
| Brownian motion | -15'370 | -         | -14'033     |



|                           |                |                 |                |
|---------------------------|----------------|-----------------|----------------|
| lambda                    | -16'477        | lambda 1e-5     | -14'724        |
| early burst               | -15'368        | r 0             | -14'031        |
| <b>Ornstein-Uhlenbeck</b> | <b>-16'518</b> | <b>alpha 10</b> | <b>-14'500</b> |

**Supplementary Table 11. Proportion of times a species was included in a regime shift for the resampled trait dataset.** Note that with one exception (*M. inflata*) all species which have shifted pollination syndrome ('mixed-vertebrate' or 'passerine') were also found to have undergone a shift in phenotypic optimum as measured by PC1 and PC2; n = 30, 100 resampling runs.

| <b>species</b>                 | <b>% shifts</b> | <b>pollination syndrome</b> |
|--------------------------------|-----------------|-----------------------------|
| <i>Axinaea affinis</i>         | 103             | passerine                   |
| <i>Axinaea cf. lawessonii</i>  | 103             | passerine                   |
| <i>Axinaea confusa</i>         | 103             | passerine                   |
| <i>Axinaea sclerophylla</i>    | 103             | passerine                   |
| <i>Axinaea costaricensis</i>   | 94              | passerine                   |
| <i>Meriania phlomoides</i>     | 78              | mixed-vertebrate            |
| <i>Meriania arborea</i>        | 70              | mixed-vertebrate            |
| <i>Meriania tomentosa</i>      | 69              | mixed-vertebrate            |
| <i>Meriania loxensis</i>       | 66              | mixed-vertebrate            |
| <i>Meriania costata</i>        | 66              | mixed-vertebrate            |
| <i>Meriania furvanthera</i>    | 66              | mixed-vertebrate            |
| <i>Meriania radula</i>         | 58              | mixed-vertebrate            |
| <i>Meriania sanguinea</i>      | 54              | mixed-vertebrate            |
| <i>Meriania aurata</i>         | 35              | buzz-bee                    |
| <i>Meriania sp. nov</i>        | 35              | buzz-bee                    |
| <i>Meriania hernandoi</i>      | 19              | buzz-bee                    |
| <i>Meriania maxima</i>         | 9               | buzz-bee                    |
| <i>Meriania drakei</i>         | 7               | buzz-bee                    |
| <i>Graffenrieda weddellii</i>  | 5               | buzz-bee                    |
| <i>Adelobotrys adscendens</i>  | 5               | buzz-bee                    |
| <i>Meriania aff. drakei</i>    | 4               | buzz-bee                    |
| <i>Meriania inflata</i>        | 2               | passerine                   |
| <i>Meriania longifolia</i>     | 2               | buzz-bee                    |
| <i>Meriania maguirei</i>       | 2               | buzz-bee                    |
| <i>Meriania mexiae</i>         | 2               | buzz-bee                    |
| <i>Meriania selvaflouensis</i> | 2               | buzz-bee                    |
| <i>Meriania silverstonei</i>   | 2               | buzz-bee                    |
| <i>Meriania speciosa</i>       | 2               | buzz-bee                    |
| <i>Meriania splendens</i>      | 2               | buzz-bee                    |
| <i>Meriania urceolata</i>      | 0               | buzz-bee                    |

**Supplementary Table 12. Comparison of fit of the two different OU-models on PC1 and PC2 on shape means and best fit model for randomly rarefied trait datasets (% of best fit from 100 runs, n = 100).**

| <b>model</b> | <b>pBIC</b> | <b>difference pBIC</b> | <b>w</b> | <b>% best fit model</b> |
|--------------|-------------|------------------------|----------|-------------------------|
|--------------|-------------|------------------------|----------|-------------------------|

---

|                              |                |              |              |           |
|------------------------------|----------------|--------------|--------------|-----------|
| estimated shifts             | -31.38         | 9.779        | 0.008        | 36        |
| <b>estimated convergence</b> | <b>-41.161</b> | <b>0.000</b> | <b>0.993</b> | <b>64</b> |

---

## Supplementary Methods

**Supplementary Table 13. Taxon sampling; details on sampling localities, voucher information, number of flowers used for HRX-CT scanning from each locality and pollination syndromes ('buzz-bee', 'mixed vertebrate', 'passerine')** are given. For species with known pollinators, references for pollinator observations are given in brackets, for species with unknown pollinators, pollination syndrome classifications have been adopted from Dellinger et al. (4).

| Species                                        | Collection number | Collector       | Country    | State/Province                          | Collection date | Voucher     | No. of flowers | Pollinator       |
|------------------------------------------------|-------------------|-----------------|------------|-----------------------------------------|-----------------|-------------|----------------|------------------|
| <i>Adelobotrys adscendens</i> (Sw.) Triana     | FA10230           | Frank Almeda    | Colombia   | Valle del Cauca                         | 04.02.2011      | CAS 1120080 | 9              | buzz-bee (4)     |
| <i>Adelobotrys adscendens</i> (Sw.) Triana     | RK5676            | Ricardo Kriebel | Panamá     | PN Chagres                              | 14.09.2011      | NYBG1653386 | 2              |                  |
| <i>Axinaea affinis</i> (Naudin) Cogn.          | AD41              | Agnes Dellinger | Ecuador    | Azuay                                   | 29.11.2012      | -           | 1              | passerine        |
| <i>Axinaea</i> cf. <i>lawessonii</i> E. Cotton | AD112             | Agnes Dellinger | Ecuador    | Loja, PN Podocarpus                     | 11.09.2016      | WU 0092822  | 1              | passerine        |
| <i>Axinaea confusa</i> E. Cotton & Borchs.     | AD136             | Agnes Dellinger | Ecuador    | Loja, PN Podocarpus                     | 18.09.2016      | WU 0092808  | 10             | passerine (4)    |
| <i>Axinaea costaricensis</i> Cogn.             | AD75              | Agnes Dellinger | Costa Rica | San José, highway to Cerro de la Muerte | 02.02.2015      | WU          | 18             | passerine (4)    |
| <i>Axinaea costaricensis</i> Cogn.             | AD74              | Agnes Dellinger | Costa Rica | San José, Cerros de Escazú              | 12.03.2015      | WU          | 11             |                  |
| <i>Axinaea sclerophylla</i> Triana             | AD109             | Agnes Dellinger | Ecuador    | Loja, PN Podocarpus                     | 10.09.2016      | WU 0092819  | 1              | passerine        |
| <i>Graffenrieda weddellii</i> Naudin           | MA1503            | Marcela Alvear  | Colombia   | Risaralda                               | 05.01.2014      | CAS 1155724 | 1              | buzz-bee         |
| <i>Meriania arborea</i> Triana                 | FA10564           | Frank Almeda    | Colombia   | Norte de Santander                      | 28.02.2012      | CAS 1128115 | 1              | mixed-vertebrate |
| <i>Meriania</i> aff. <i>drakei</i>             | AD140             | Agnes Dellinger | Ecuador    | Pastaza, Reserva EcoMinga               | 13.11.2016      | QCNE        | 4              | buzz-bee         |
| <i>Meriania</i> aff. <i>drakei</i>             | AD141             | Agnes Dellinger | Ecuador    | Pastaza, Reserva EcoMinga               | 13.11.2016      | QCNE        | 3              | buzz-bee         |
| <i>Meriania</i> aff. <i>drakei</i>             | AD141B            | Agnes Dellinger | Ecuador    | Pastaza, Reserva EcoMinga               | 13.11.2016      | QCNE        | 2              | buzz-bee         |

|                                                            |         |                   |            |                               |            |              |   |                      |
|------------------------------------------------------------|---------|-------------------|------------|-------------------------------|------------|--------------|---|----------------------|
| <i>Meriania aff. drakei</i>                                | AD152   | Agnes Dellinger   | Ecuador    | Pastaza, Reserva EcoMinga     | 15.11.2016 | WU 0092853   | 2 | buzz-bee             |
| <i>Meriania aurata</i> C. Ulloa, D. Fernández & D.A. Neill | AD145   | Agnes Dellinger   | Ecuador    | Pastaza, Reserva EcoMinga     | 13.11.2016 | QCNE         | 2 | buzz-bee             |
| <i>Meriania costata</i> Wurdack                            | AD106   | Agnes Dellinger   | Ecuador    | Loja, PN Podocarpus           | 10.09.2016 | WU 0092833   | 4 | mixed-vertebrate (4) |
| <i>Meriania drakei</i> (Cogn.) Wurdack                     | AD132   | Agnes Dellinger   | Ecuador    | Napo, Cosanga along roadside  | 14.10.2016 | WU 0092810   | 8 | buzz-bee (4)         |
| <i>Meriania furvanthera</i> Wurdack                        | AD23    | Agnes Dellinger   | Ecuador    | Loja, El Tiro                 | 20.10.2012 | WU 0072421   | 1 | mixed-vertebrate (4) |
| <i>Meriania furvanthera</i> Wurdack                        | AD124   | Agnes Dellinger   | Ecuador    | Loja, PN Podocarpus           | 13.09.2016 | WU 0092838   | 3 |                      |
| <i>Meriania hernandoi</i> L. Uribe                         | AD131   | Agnes Dellinger   | Ecuador    | Napo, Cosanga along roadside  | 14.10.2016 | WU 0092801   | 8 | buzz-bee (4)         |
| <i>Meriania inflata</i> Michelangeli & R. Goldenb.         | RG2078  | Renato Goldenberg | Brazil     | Bahia                         | 13.10.2014 | NYBG02286571 | 1 | passerine            |
| <i>Meriania longifolia</i> (Naudin) Cogn.                  | FA10536 | Frank Almeda      | Colombia   | Norte de Santander            | 25.02.2012 | CAS 1127902  | 1 | buzz-bee (5)         |
| <i>Meriania loxensis</i> Gleason                           | AD115   | Agnes Dellinger   | Ecuador    | Loja, PN Podocarpus           | 12.09.2016 | QCNE         | 3 | mixed-vertebrate     |
| <i>Meriania maguirei</i> Wurdack                           | AD110   | Agnes Dellinger   | Ecuador    | Loja                          | 11.09.2016 | QCNE         | 4 | buzz-bee (4)         |
| <i>Meriania maxima</i> Markgr.                             | MA1768  | Marcela Alvear    | Colombia   | Narino                        | 16.02.2013 | CAS 1155921  | 4 | buzz-bee (4)         |
| <i>Meriania maxima</i> Markgr.                             | AD104   | Agnes Dellinger   | Ecuador    | Pichincha, Reserva Bellavista | 08.09.2016 | WU 0092813   | 1 |                      |
| <i>Meriania mexiae</i> Wurdack                             | MA1853  | Marcela Alvear    | Colombia   | Putumayo                      | 16.02.2013 | CAS 1156500  | 1 | buzz-bee             |
| <i>Meriania phlomoides</i> (Triana)                        | AD78    | Agnes Dellinger   | Costa Rica | Heredia, Cerro Dantas         | 07.03.2015 | WU 583185    | 6 | mixed-vertebrate (4) |
| <i>Meriania phlomoides</i> (Triana)                        | AD76    | Agnes Dellinger   | Costa Rica | Puntarenas, Monteverde        | 22.02.2015 | WU           | 4 |                      |
| <i>Meriania radula</i> (Benth.) Triana                     | AD15    | Agnes Dellinger   | Ecuador    | Loja, PN Podocarpus           | 11.10.2012 | WU 0072420   | 1 | mixed-vertebrate     |

|                                                                  |         |                    |          |                                  |            |             |   |                            |
|------------------------------------------------------------------|---------|--------------------|----------|----------------------------------|------------|-------------|---|----------------------------|
| <i>Meriania sanguinea</i><br>Wurdack                             | AD108   | Agnes<br>Dellinger | Ecuador  | Loja, PN<br>Podocarpus           | 10.09.2016 | WU 0092832  | 8 | mixed-vertebrate<br>(4)    |
| <i>Meriania selvaflorensis</i><br>Humberto Mend.                 | MA1465  | Marcela<br>Alvear  | Colombia | Caldas                           | 02.03.2011 | CAS 1119760 | 1 | buzz-bee                   |
| <i>Meriania silverstonei</i><br>Humberto Mend. & Fern.<br>Alonso | FA10210 | Frank<br>Almeda    | Colombia | Valle del Cauca                  | 01.02.2011 | CAS 1120063 | 1 | buzz-bee                   |
| <i>Meriania speciosa</i> (Bonpl.)<br>Naudin                      | FA10219 | Frank<br>Almeda    | Colombia | Valle del Cauca                  | 02.02.2011 | CAS 1119942 | 1 | buzz-bee                   |
| <i>Meriania splendens</i> Triana                                 | MA1690  | Marcela<br>Alvear  | Colombia | Narino                           | 25.01.2013 | CAS 1156411 | 1 | buzz-bee                   |
| <i>Meriania sp. nov</i>                                          | AD158   | Agnes<br>Dellinger | Ecuador  | Pastaza, Reserva<br>EcoMinga     | 15.11.2016 | WU 0092855  | 1 | buzz-bee                   |
| <i>Meriania tomentosa</i><br>(Cogn.)                             | AD30    | Agnes<br>Dellinger | Ecuador  | Loja, PN<br>Podocarpus           | 30.10.2012 | WU 0072422  | 1 | mixed-vertebrate<br>(4, 6) |
| <i>Meriania tomentosa</i><br>(Cogn.)                             | AD105   | Agnes<br>Dellinger | Ecuador  | Pichincha, Reserva<br>Bellavista | 08.09.2016 | WU 0092814  | 2 | mixed-vertebrate<br>(4,6)  |
| <i>Meriania tomentosa</i><br>(Cogn.)                             | AD111   | Agnes<br>Dellinger | Ecuador  | Loja, PN<br>Podocarpus           | 11.09.2016 | QCNE        | 2 | mixed-vertebrate<br>(4, 6) |
| <i>Meriania urceolata</i> Triana                                 | KR1446  | Karen<br>Redden    | Guyana   | Cuyuni-Mazaruni                  | 08.12.2002 | NY02513392  | 1 | buzz-bee                   |

**Supplementary Table 14. Best-fit model selection for estimation of ancestral pollination syndrome using ML methods.** ‘ER’ – equal rates model; ‘ARD’ – all rates different model.

| model | AIC   | LogL   | p    |
|-------|-------|--------|------|
| ER    | 40.28 | -19.14 |      |
| ARD   | 49.12 | -18.56 | 0.95 |

**Supplementary Table 15: Number of intact specimens and number of specimens where single landmarks were estimated,** grouped by each subset within which they were estimated and into which pollination syndrome specimens are grouped.

| Subset for estimation          | No. intact specimens | No. estimated | Total no. subset | Pollination syndrome | Total no. syndrome |
|--------------------------------|----------------------|---------------|------------------|----------------------|--------------------|
| large flowered <i>Meriania</i> | 12                   | 33            | 45               | buzz-bee             |                    |
| <i>Adelobotrys sp.</i>         | 4                    | 7             | 11               | buzz-bee             | 57                 |
| <i>Graffenrieda sp.</i>        | 1                    | 0             | 1                | buzz-bee             |                    |
| <i>M. tomentosa</i> group      | 16                   | 12            | 28               | mixed-vertebrate     | 37                 |
| <i>M. sanguinea</i> group      | 8                    | 1             | 9                | mixed-vertebrate     |                    |
| <i>Axinaea sp., M. inflata</i> | 33                   | 10            | 43               | passerine            | 43                 |

**Supplementary Table 16: Proportion of simulations where one or more landmarks differed significantly between the estimated and the intact set (T-test/F-test) for the four different estimation techniques.** TPS was chosen to estimate landmarks in specimens with missing data.

| Subset for estimation           | BPCA   | MS        | REG    | TPS    |
|---------------------------------|--------|-----------|--------|--------|
| large flowered <i>Meriania</i>  | 0/0.03 | 0/0.65    | 0/0.01 | 0/0.04 |
| <i>Adelobotrys adscendens</i>   | 0/0.22 | 0.01/0.38 | -      | 0/0.15 |
| <i>Meriania tomentosa</i> group | 0/0.01 | 0/0.87    | 0/0.01 | 0/0.01 |
| <i>Meriania sanguinea</i> group | 0/0.13 | 0/0.69    | 0/0.31 | 0/0    |
| <i>Axinaea sp., M. inflata</i>  | 0/0    | 0/0.8     | 0/0    | 0/0    |

## Supplementary Literature

1. Esteve-Altava. B. In search of morphological modules: a systematic review. *Biol Rev Camb Philos Soc* 92(3). 1332-1347 (2017).
2. Fornoni. J. Ordano. M., Pérez-Ishiwara. R. Boege. K. & Domínguez. C. A. A comparison of floral integration between selfing and outcrossing species: a meta-analysis. *Ann Bot* 117(2). 299-306 (2016).
3. Diggle. P. K. Modularity and intra-floral integration in metameric organisms: plants are more than the sum of their parts. *Philos Trans R Soc Lond B Biol Sci* 369(1649). 20130253 (2014).
4. Dellinger. A. S. et al. Beyond buzz-pollination – departures from an adaptive plateau lead to new pollination syndromes. *New Phytol*. Available at <https://doi.org/10.1111/nph.15468> (12 October 2018).
5. Renner. S. S. A survey of reproductive biology in Neotropical Melastomataceae and Memecylaceae. *Ann Mo Bot Gard* 76(2). 496-518 (1989).
6. Vogel. S. Remarkable nectaries: structure, ecology, organophyletic perspectives I. Substitutive nectaries. *Flora* 192: 305–333 (1997).
