# Supplementary material for: Modularity increases rate of floral evolution and adaptive success for functionally specialized pollination systems
Source: PubMed Central journal article supplement (PMC6895197; doi:10.1038/s42003-019-0697-7), 2019-12-05
Supplement: 42003_2019_697_MOESM2_ESM.pdf [file 42003_2019_697_MOESM2_ESM.pdf]

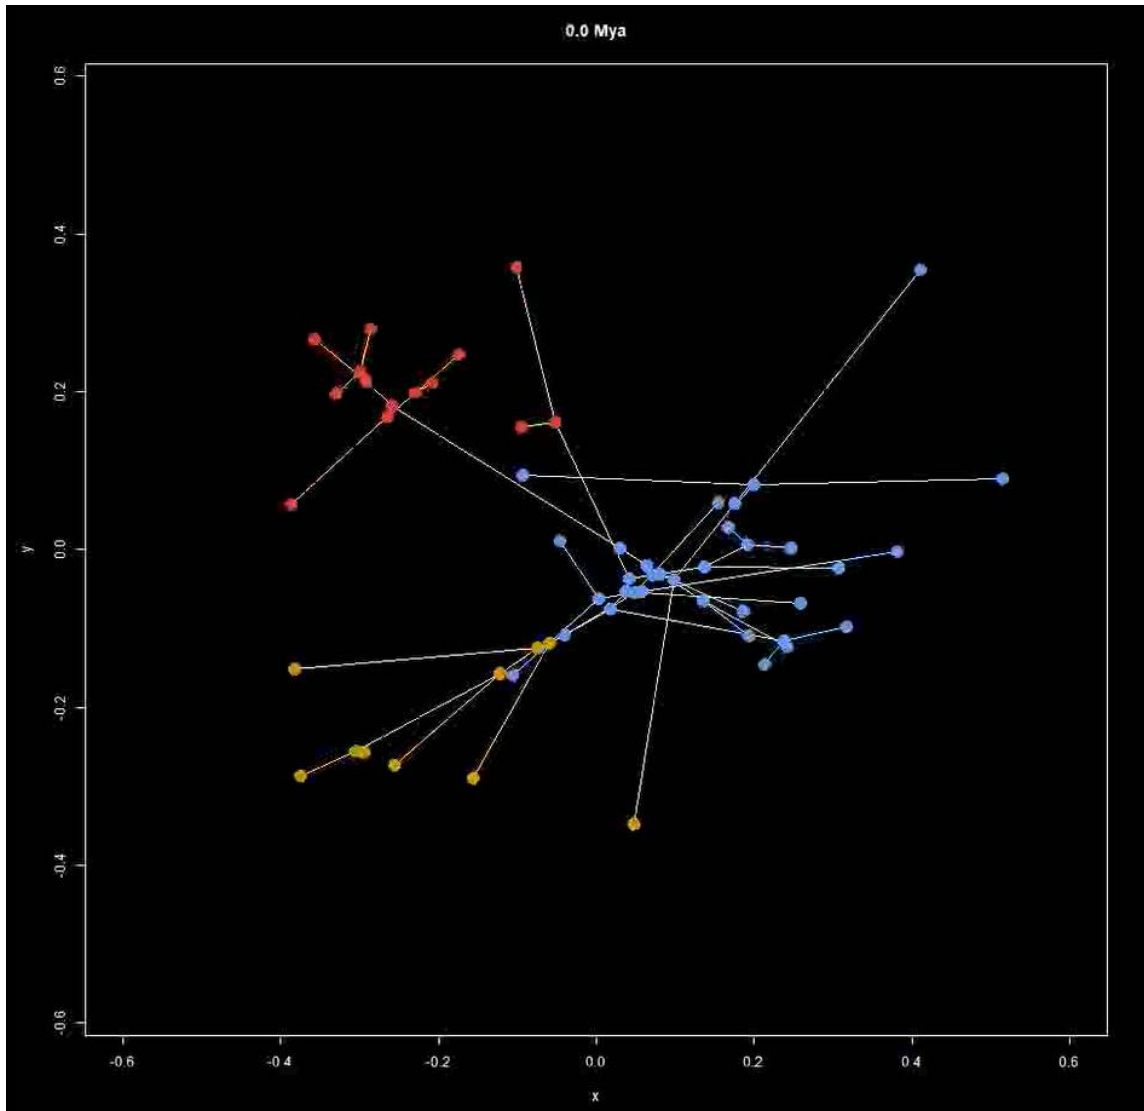

**Supplementary Movie 1. Phylomorphospace of Merianieae flower shape (PC1 and PC2) through evolutionary time.** Note the stasis of nodes in the central to right area of shape space occupied by extant 'buzz-bee' syndrome species ('ancestral shape space'), while branches where shifts to the 'mixed-vertebrate' or 'passerine' syndrome have occurred explore and converge in new areas of flower shape space. Branches are coloured according to reconstructions of ancestral pollination systems ('buzz-bee' – blue, 'mixed-vertebrate' – red, 'passerine' – yellow)
